# Supplementary material for: Solvent-induced switching between two supramolecular assemblies of a guanosine–terthiophene conjugate
Source: Royal Society of Chemistry journal article supplement (doi:10.1039/b920220j), 2009-12-17

## Supplementary information

for

# Solvent-induced switching between two supramolecular assemblies of a guanosine-terthiophene conjugate

Silvia Pieraccini, Sara Bonacchi, Stefano Lena, Stefano Masiero, Marco Montalti, Nelsi Zaccheroni and Gian Piero Spada

(gianpiero.spada@unibo.it)

## Table of contents

|                                                                                              |     |
|----------------------------------------------------------------------------------------------|-----|
| Experimental details                                                                         | S2  |
| CD/UV spectra of <b>1</b> -KPicrate and <b>1</b> -KFormate in CHCl <sub>3</sub>              | S3  |
| <sup>1</sup> H NMR spectra of <b>1</b> -KPicrate and <b>1</b> -KFormate in CDCl <sub>3</sub> | S4  |
| <sup>1</sup> H NMR spectra of <b>1</b> in CDCl <sub>3</sub>                                  | S4  |
| NOESY spectrum of <b>1</b> -KPicrate in CDCl <sub>3</sub>                                    | S5  |
| CD spectra <b>1</b> -KPicrate: switching between the two different solvent conditions        | S6  |
| <sup>1</sup> H NMR spectra of <b>1</b> in ACN/CDCl <sub>3</sub> 9/1                          | S6  |
| NOESY spectrum of <b>1</b> in CD <sub>3</sub> CN/CDCl <sub>3</sub> 9/1                       | S7  |
| CD/UV spectra of <b>1</b> -Kpicrate in ACN/CHCl <sub>3</sub> 9/1                             | S8  |
| Dynamic Light Scattering measurement of <b>1</b> -KPic in ACN/CHCl <sub>3</sub> 9/1          | S9  |
| <sup>1</sup> H NMR spectra of <b>1</b> in CDCl <sub>3</sub> at variable temperatures         | S10 |

## Preparation of samples for spectroscopic measurements

Chloroform solutions of **1**-Kpic. To 1 mL of a 15 mM solution of **1** in CHCl<sub>3</sub> (or CDCl<sub>3</sub>) were added 210 μL of a 8.8 mM ACN (or ACN-*d*<sub>3</sub>) solution of K-picrate (0.125 eq of Kpic). The resulting solution was stirred for 20 min at room temperature and, when necessary, it was diluted up to 3, 0.3 or 0.03 mM with CHCl<sub>3</sub> (or CDCl<sub>3</sub>).

Acetonitrile/chloroform 9/1 solutions of **1**-Kpic. In a typical experiment, 0.1 mL of a 3 mM chloroform solution of **1**-Kpic (prepared as described above) were added with 0.9 mL of ACN (or ACN-*d*<sub>3</sub>) to give a 0.3 mM solution. When necessary, the resulting solution was diluted with ACN or ACN-*d*<sub>3</sub> up to 0.03 mM. All spectra were recorded after keeping samples at room temperature for 20 min.

Acetonitrile/chloroform 9/1 solutions of **1**. In a typical experiment, 0.1 mL of a 3 mM solution of **1** in CHCl<sub>3</sub> (or CDCl<sub>3</sub>) were added with 0.9 mL of ACN (or ACN-*d*<sub>3</sub>) to give a 0.3 mM solution. When necessary, this latter solution was diluted again (with ACN or ACN-*d*<sub>3</sub>) up to 0.03 mM. All spectra were recorded after keeping samples at room temperature for 20 min.

**Figure S1.** CD spectra recorded at r.t. on **1**-KPic in CHCl<sub>3</sub> at different concentrations: 3 mM (red trace, path length cell = 0.01 cm), 0.3 mM (blue trace, path length cell = 0.1 cm), 0.03 mM (gray trace, path length cell = 1 cm).

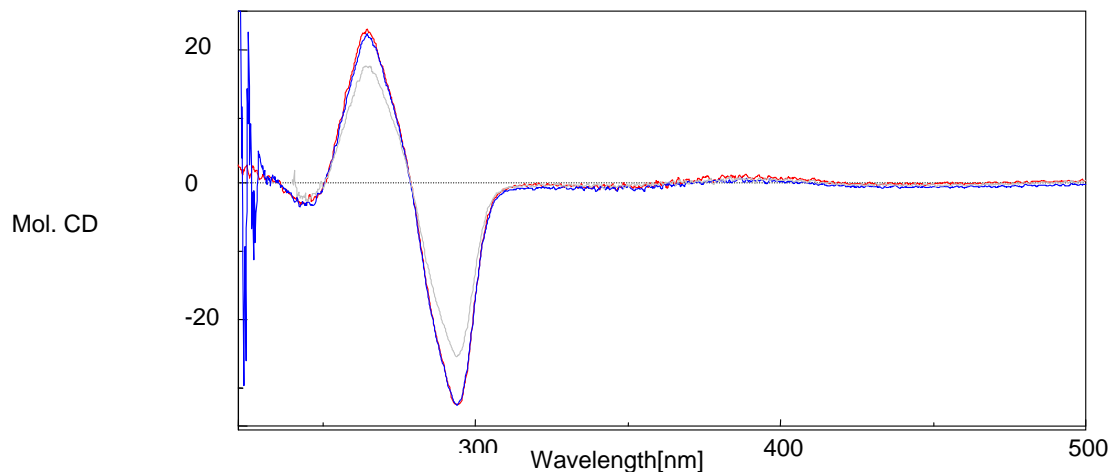

**Figure S2.** Comparison between CD/UV spectra recorded at r.t. on **1**-Kpicrate (pink trace) and **1**-Kformate (red trace) in CHCl<sub>3</sub> ( $c = 3$  mM, path length cell = 0.01 cm).

The chloroform solution of **1**-KPic was prepared as described above (see experimental section).

The chloroform solution of **1**-KForm was prepared upon addition of 0.125 eq of solid K formate to a 3 mM chloroform solution of **1** and 48h of stirring at room temperature.

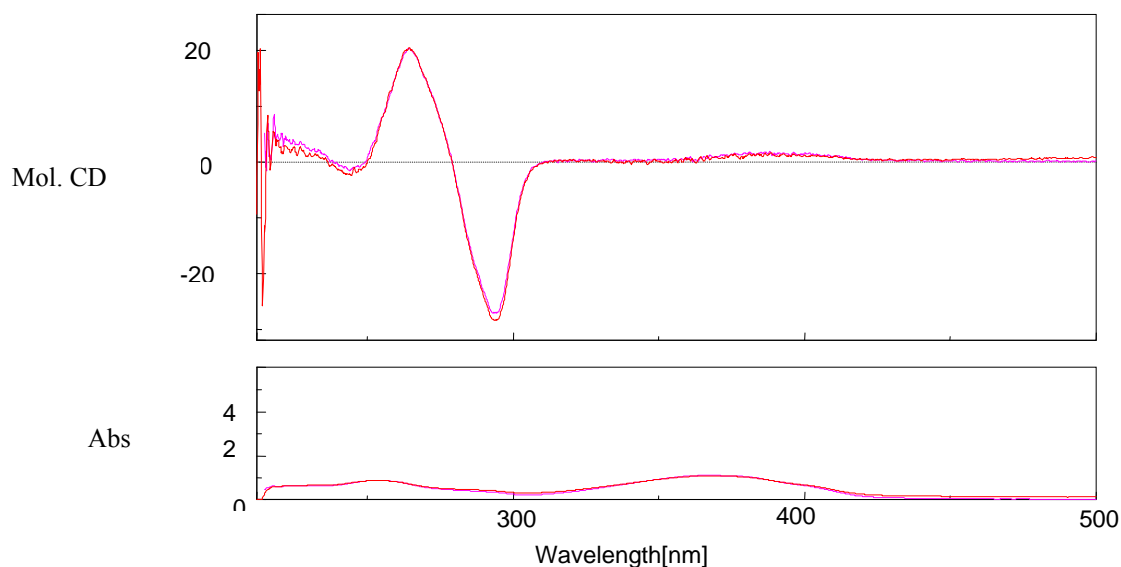

**Figure S3.** Comparison between  $^1\text{H}$  NMR (600 MHz) spectra recorded at 25°C on **1**-KPicrate (a) and **1**-KFormate (b) in  $\text{CDCl}_3$  ( $c = 3 \text{ mM}$ ).

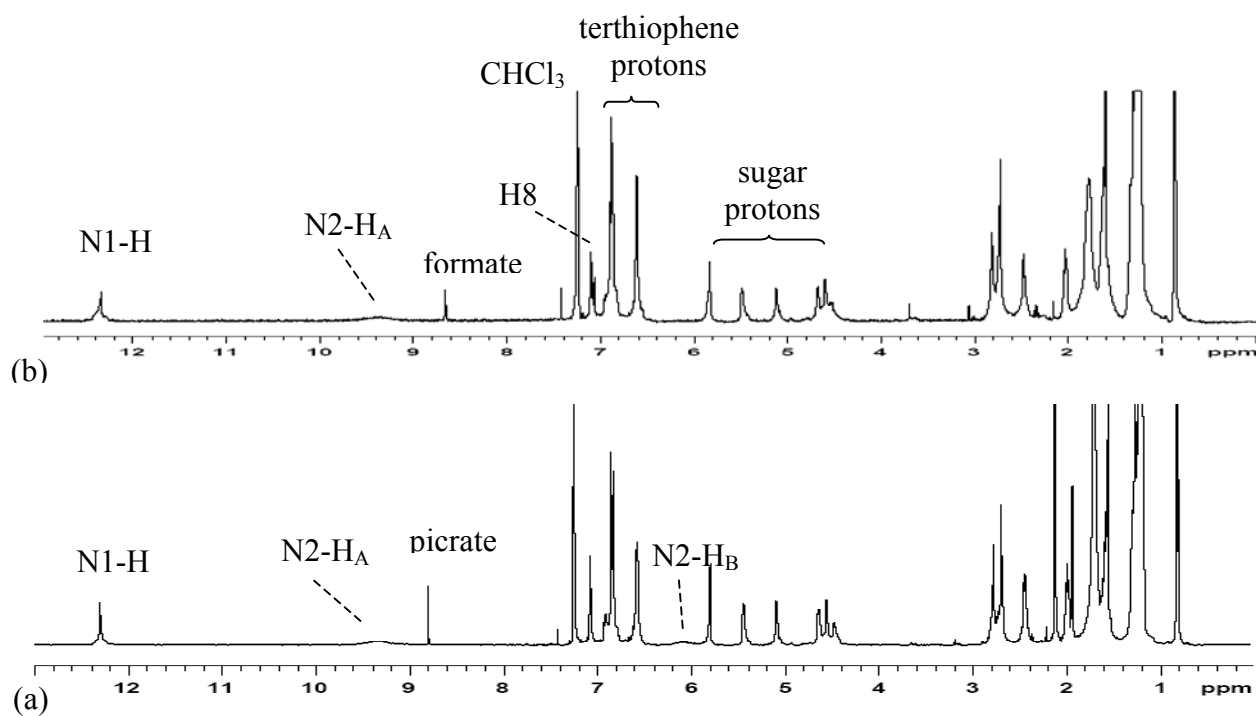

**Figure S4.**  $^1\text{H}$  NMR (600 MHz) spectra recorded at 25°C on **1** in  $\text{CDCl}_3$  at different concentrations ( $c = 0.3 \text{ mM}$  (a);  $c = 15 \text{ mM}$  (b)).

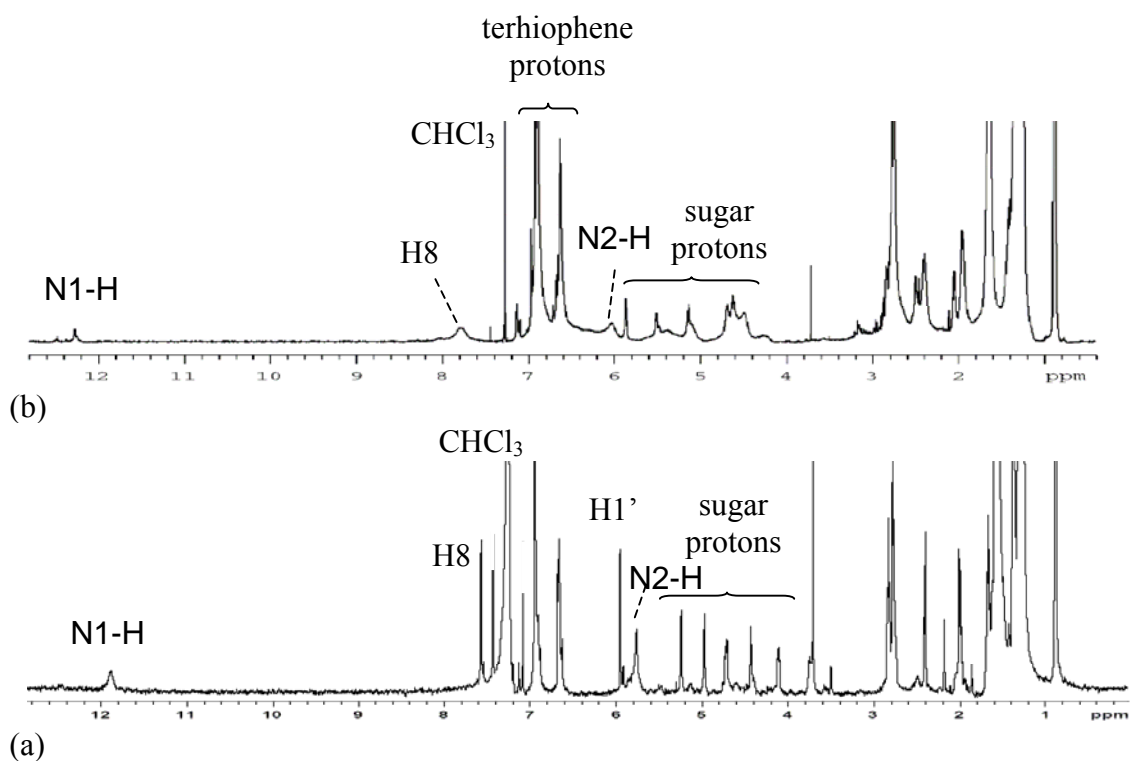

**Figure S5.** Portions of the NOESY spectrum (600 MHz, mixing time 200 ms) of **1**-KPic in CDCl<sub>3</sub> 15 mM recorded at −15°C. Relevant intermolecular cross-peaks for the *D*<sub>4</sub>-octameric architecture (between H8 and H5'/H5'' (spectrum (a)), and between H8 and the two amino protons (spectrum (b))), are boxed in red lines. In spectrum (a) can be noted also the strong intramolecular NOE crosspeak between H8 and H1' indicative of a *syn* conformation around the glycosidic bond.

Spectrum (a)

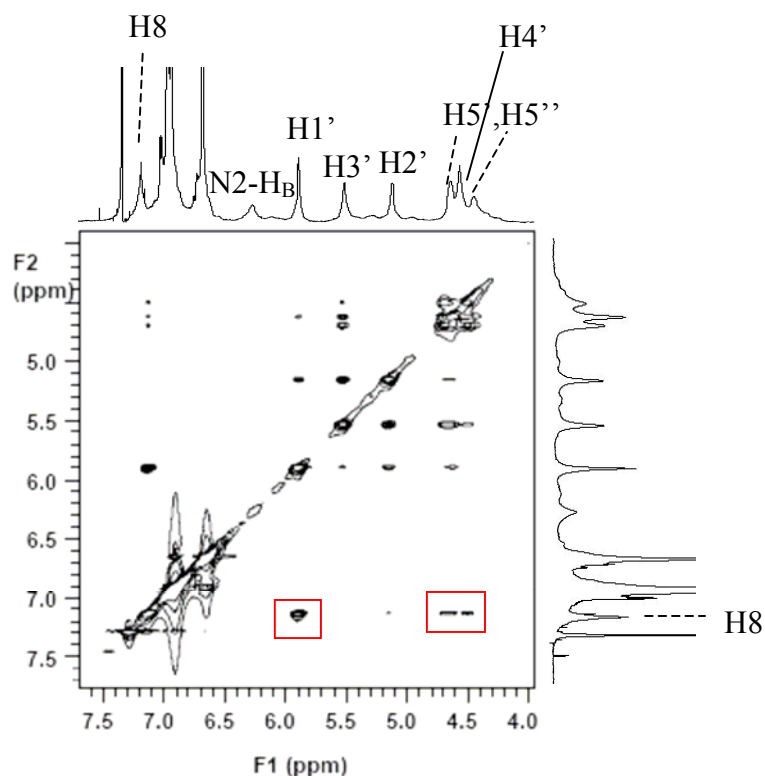

Spectrum (b)

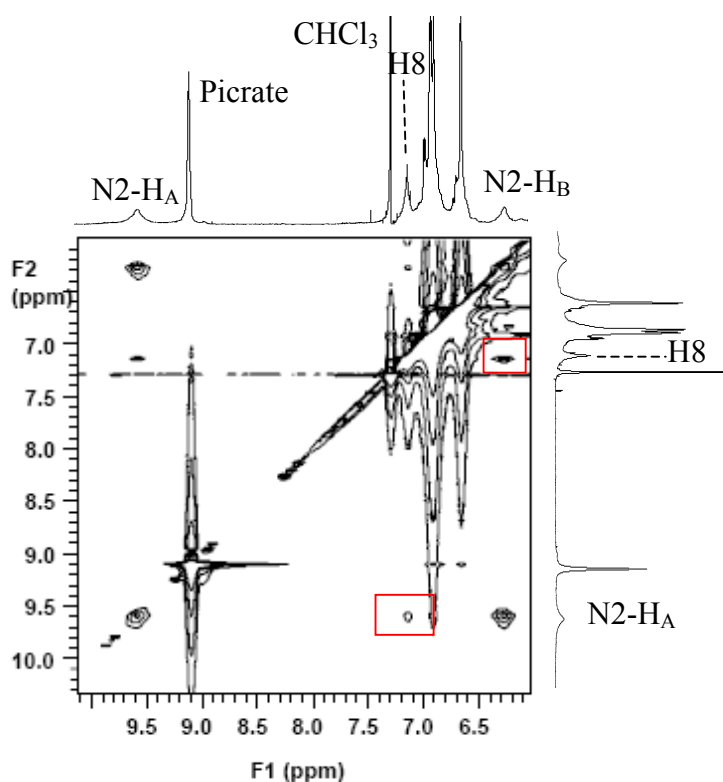

**Figure S6.** CD spectra recorded at r.t. on **1**-Kpic showing the partially reversible-switching between the two supramolecular chiral forms in the two different solvent conditions.

blue trace (cell path length  $d = 0.1$  cm): **1**-Kpic in ACN/ $\text{CHCl}_3$  9/1 0.3 mM is the initial solution  $S_i$ ;

red trace ( $d = 1$  cm): solution  $S_i$  diluted with ACN up to 0.03 mM;

pink trace ( $d = 1$  cm): solution  $S_i$  diluted with  $\text{CHCl}_3$  up to 0.03 mM.

gray trace ( $d = 1$  cm): freshly prepared solution of **1**-Kpic in  $\text{CHCl}_3$  0.03 mM.

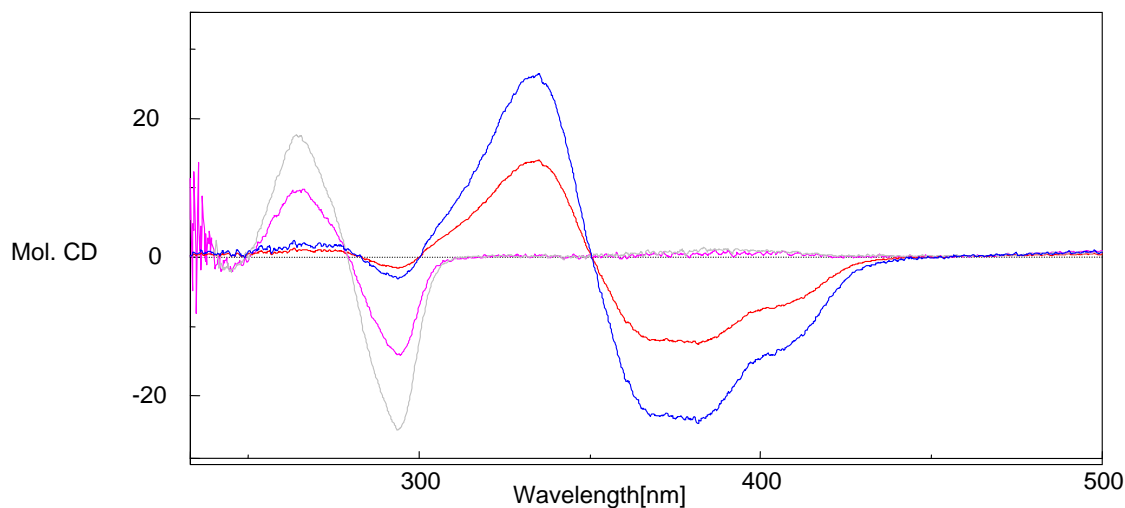

**Figure S7.**  $^1\text{H}$  NMR (600 MHz) spectra of **1** in ACN/ $\text{CDCl}_3$  9/1 ( $c = 0.3$  mM) recorded at  $5^\circ\text{C}$  (a) and  $25^\circ\text{C}$  (b).

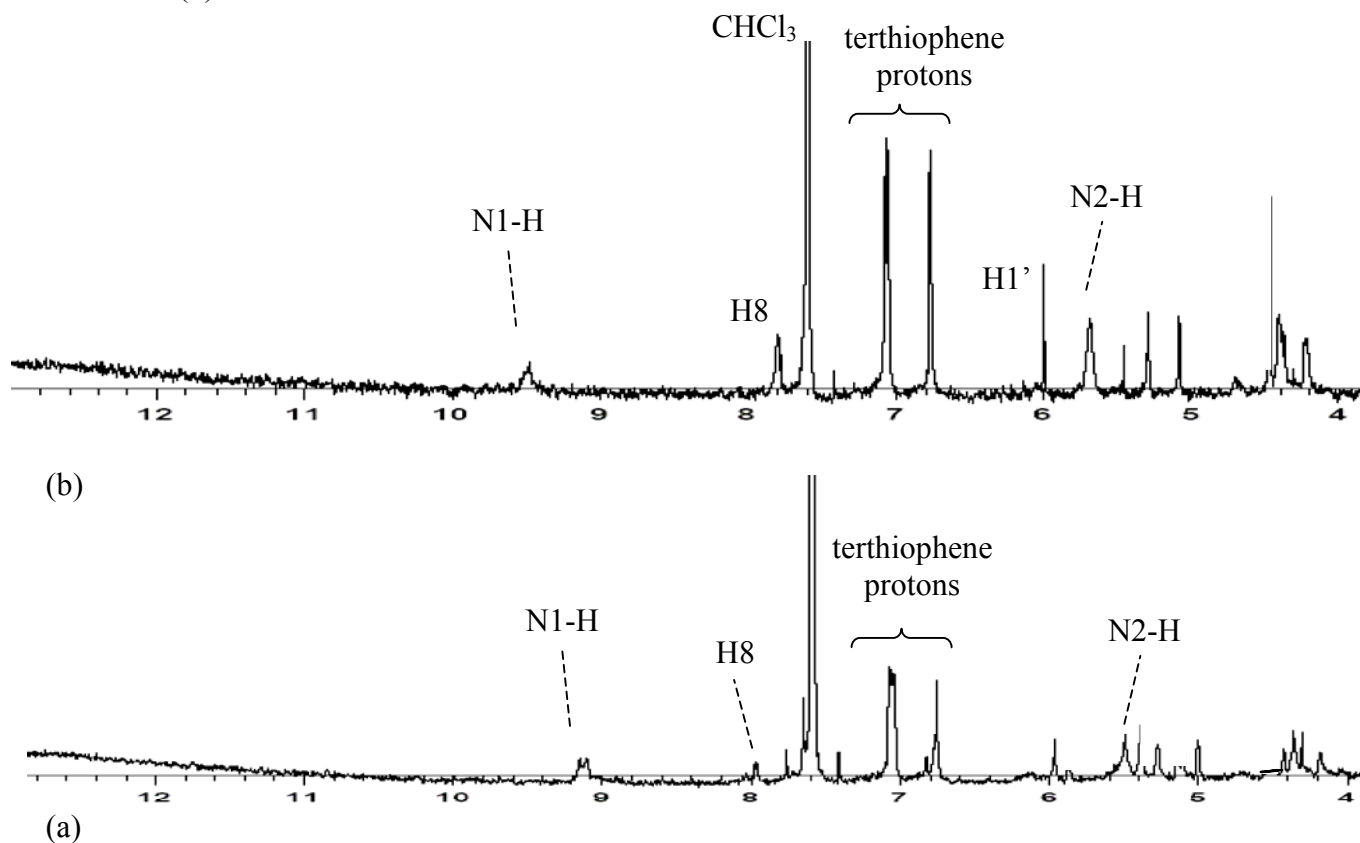

**Figure S8.** Portions of the NOESY spectrum (600 MHz, mixing time 200 ms) of **1** in CD<sub>3</sub>CN/CDCl<sub>3</sub> 9/1 0.3 mM recorded at r.t. In spectrum (a) can be noted the intramolecular NOE crosspeak between H8 and H1' (stronger than between H8 and H2') indicative of a *syn* conformation around the glycosidic bond. In spectrum (b) NOE interactions between the terthiophene ring protons e-h and the methylene hydrogens c and l are observed. All signals have been assigned by COSY experiments.

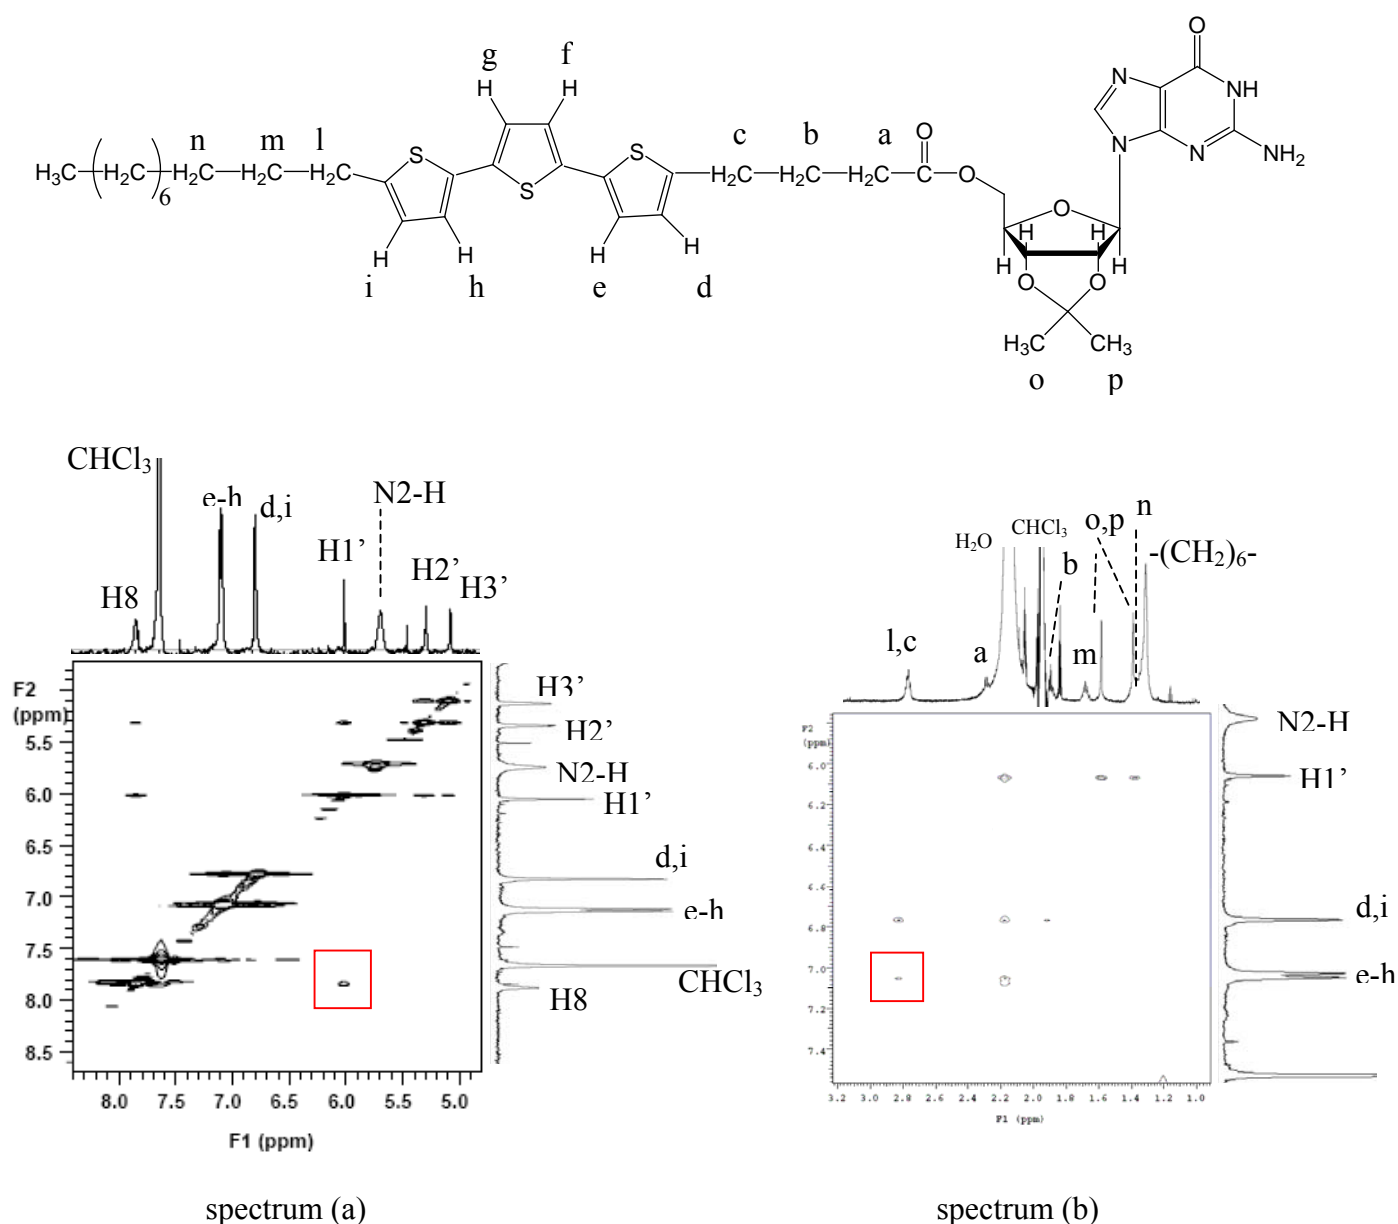

**Figure S9.** CD/UV spectra recorded at r.t. on three different samples of **1**-Kpic in ACN/CHCl<sub>3</sub> 9/1 0.3 mM (cell path length = 0.1 cm) prepared according to the same experimental procedure.

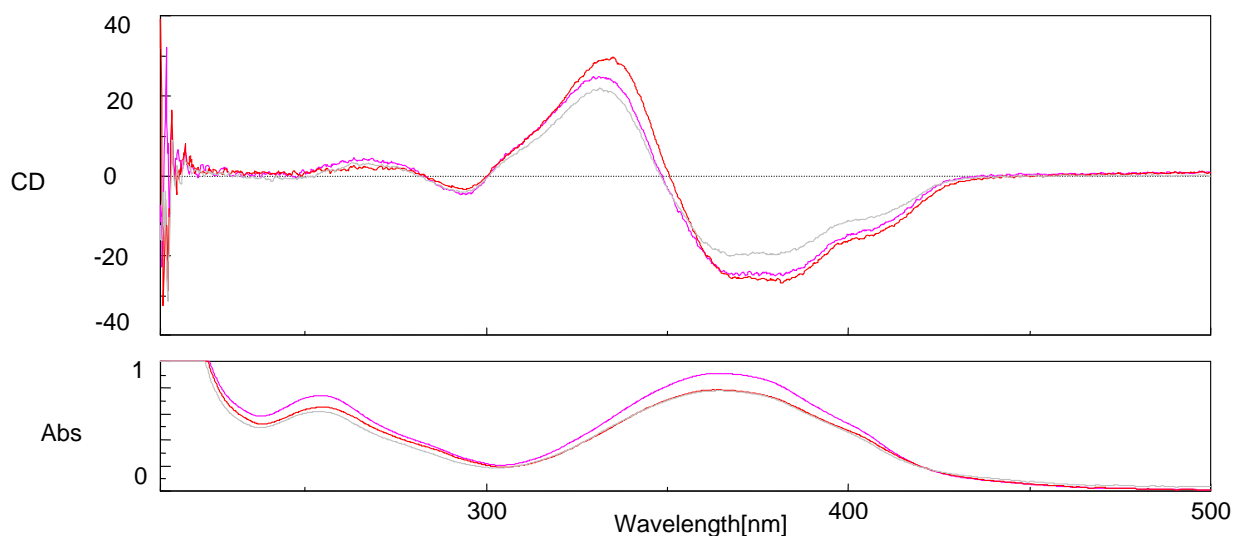

**Figure S10.** CD/UV spectra of **1**-Kpic in ACN/CHCl<sub>3</sub> 9/1 0.3 mM (cell path length = 0.1 cm) recorded, at r.t., as a function of time: (a) freshly prepared solution (blue trace), (b) sample (a) after one night (red trace), (c) sample (a) after three days (gray trace), (d) sample (a) after four months (pink trace). The sample was stored in the fridge and each spectrum was recorded after 30 min of equilibration time at room temperature.

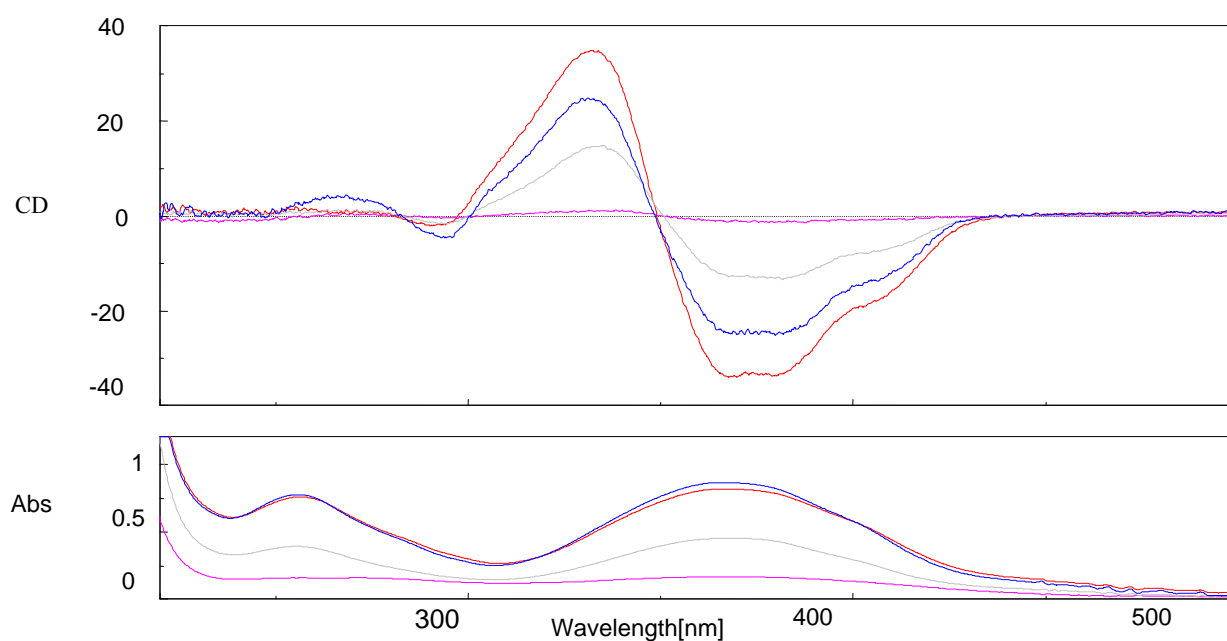

**Figure S11.** Dynamic Light Scattering measurement of **1**-KPic in ACN/CHCl<sub>3</sub> 9/1. Size distribution by intensity and undersize curve,  $D_H = 79.20$  nm, PDI=0.05.

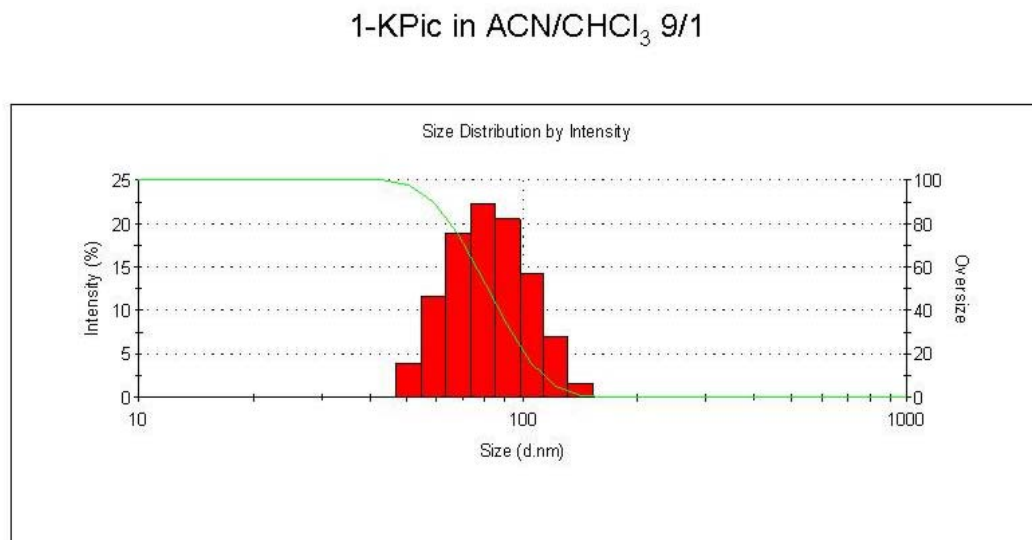

**Figure S12.** CD/UV spectra of **1**-Kpic in ACN/CHCl<sub>3</sub> 9/1 0.3 mM (cell path length = 0.1 cm) recorded at variable temperature, (a) at 5°C (red trace), at 25°C (gray trace), at 40°C (blue trace), at 50°C (pink trace). All spectra were recorded after 20 min of equilibration time at each recording temperature.

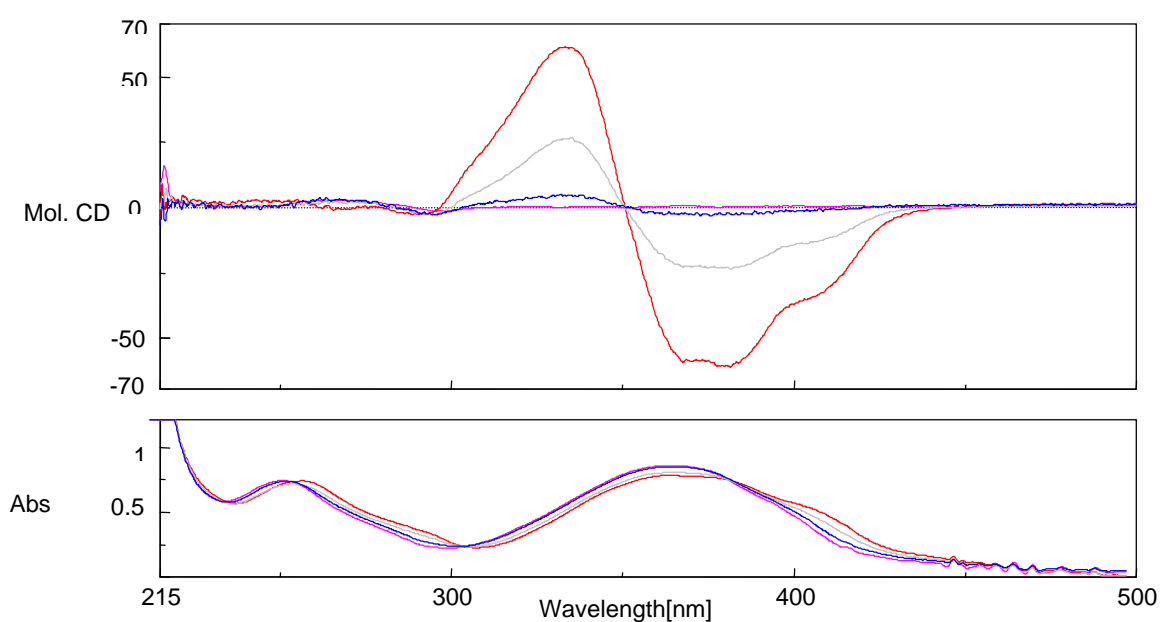

**Figure S13.**  $^1\text{H}$  NMR (600 MHz) spectra of **1** in  $\text{CDCl}_3$  ( $c = 0.3 \text{ mM}$ ) recorded at  $5^\circ\text{C}$  (a) and  $25^\circ\text{C}$  (b).

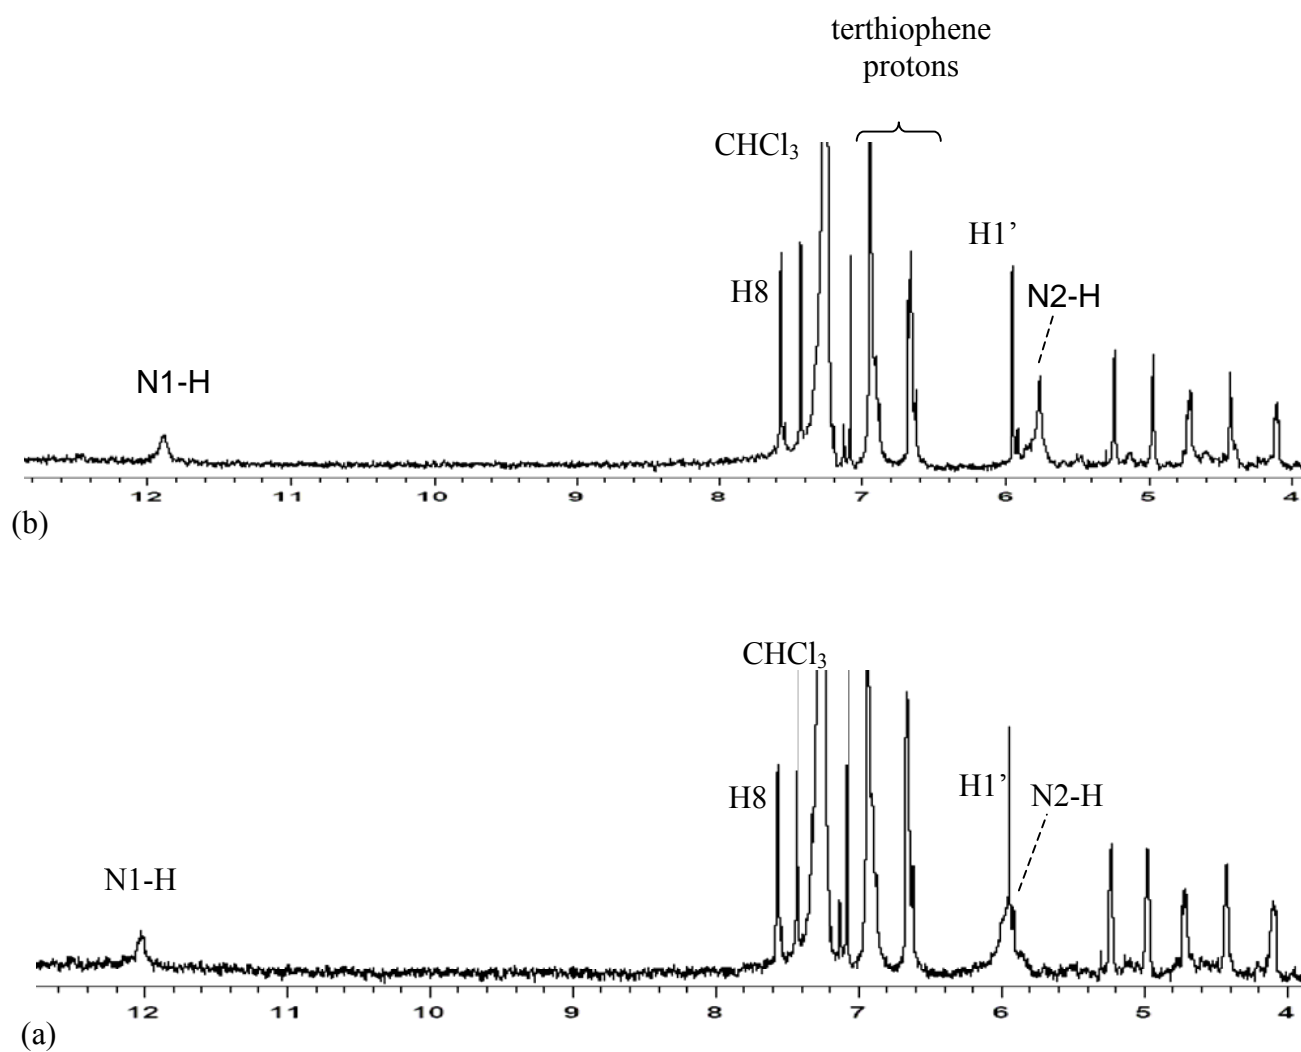

Supplement: b920220j.pdf [file b920220j.pdf]
